# Supplementary material for: Novel broad-spectrum activity-based probes to profile malarial cysteine proteases
Source: PubMed Central journal article supplement (PMC6953825; doi:10.1371/journal.pone.0227341), 2020-01-10

# LCMS Trace

# m/z Ions

W-Cy5-VS

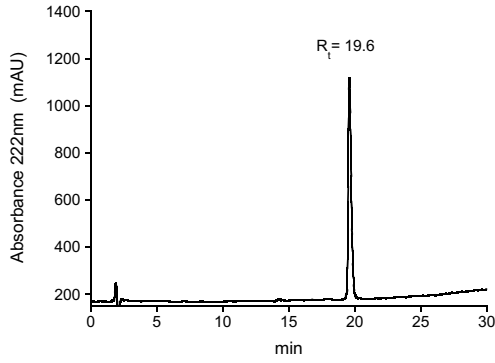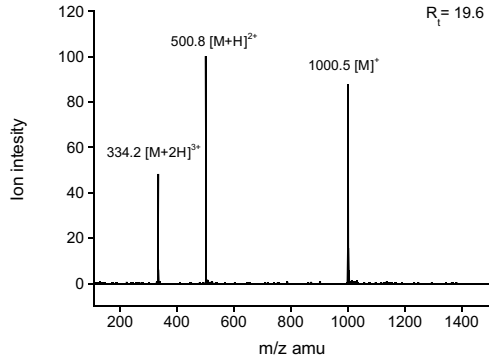

W-sCy5-VS

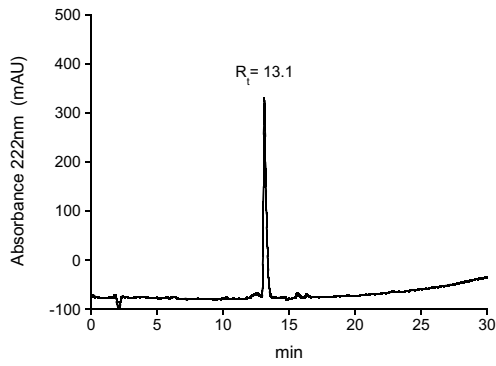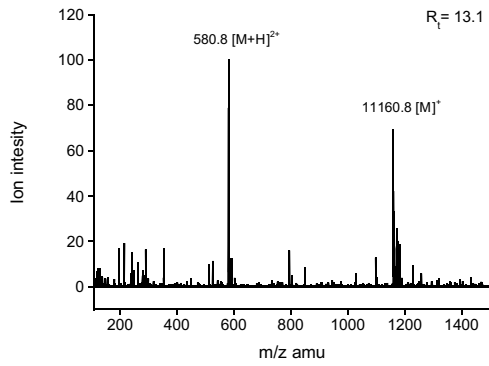

W-Cy3-VS

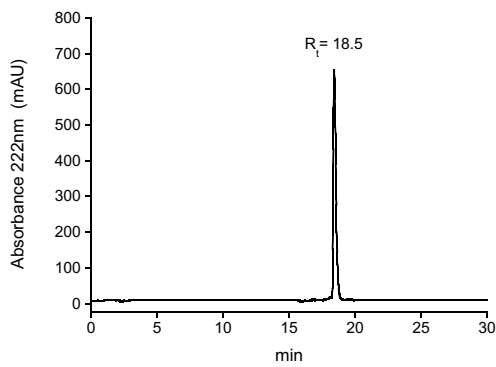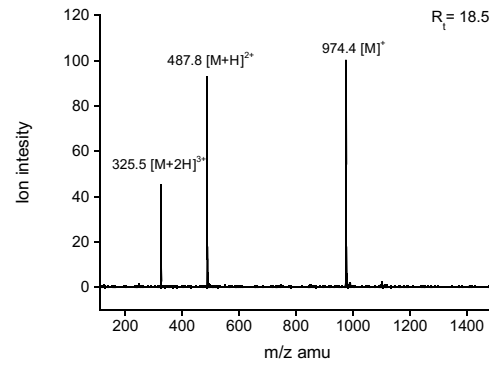

W-sCy3-VS

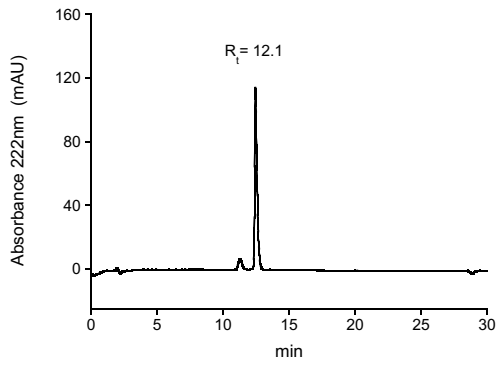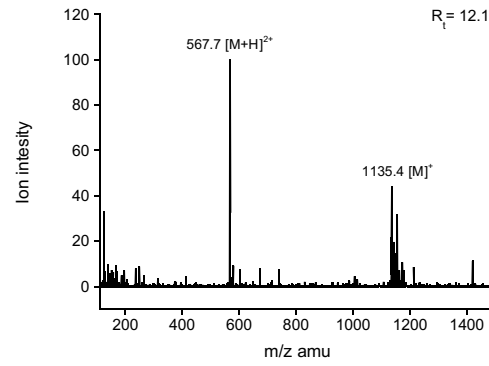

W-BF-VS

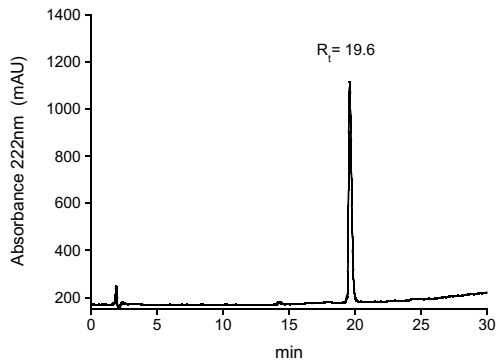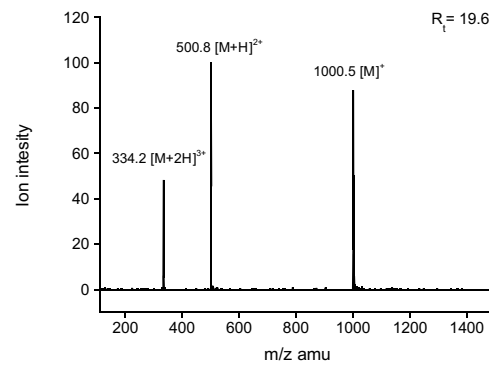

Supplement: pone.0227341.s001.pdf [file pone.0227341.s001.pdf]
