# Supplementary material for: Novel broad-spectrum activity-based probes to profile malarial cysteine proteases
Source: PubMed Central journal article supplement (PMC6953825; doi:10.1371/journal.pone.0227341), 2020-01-10

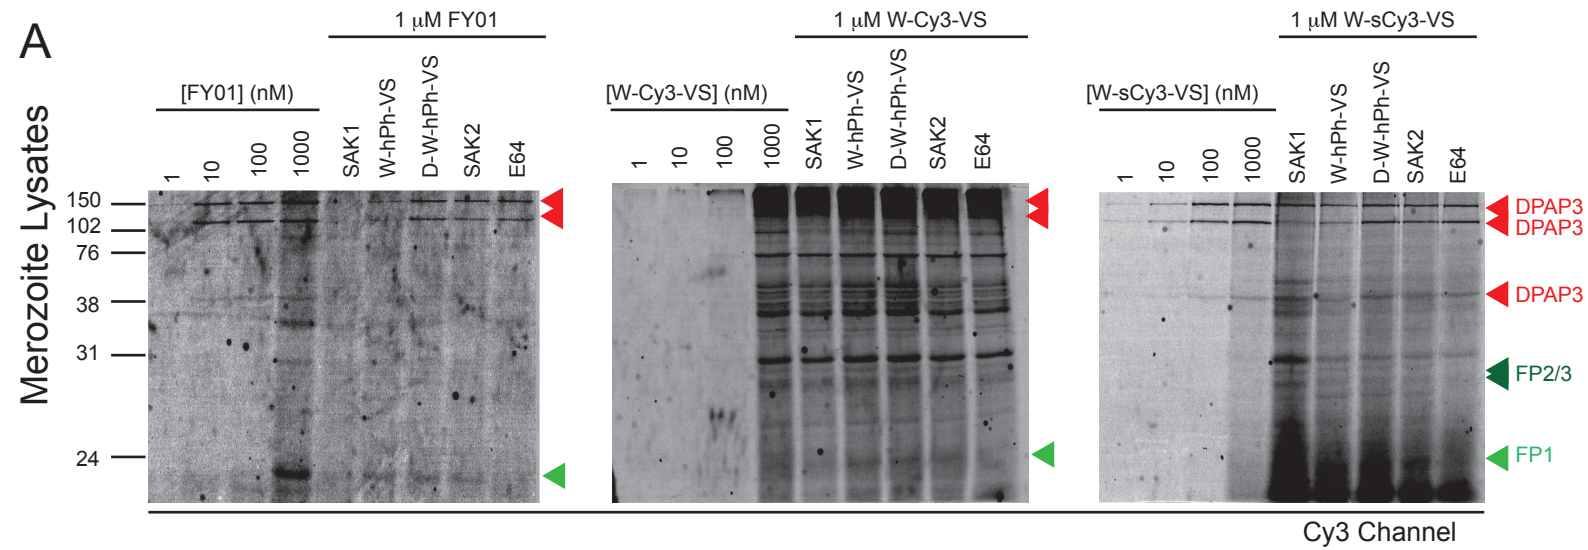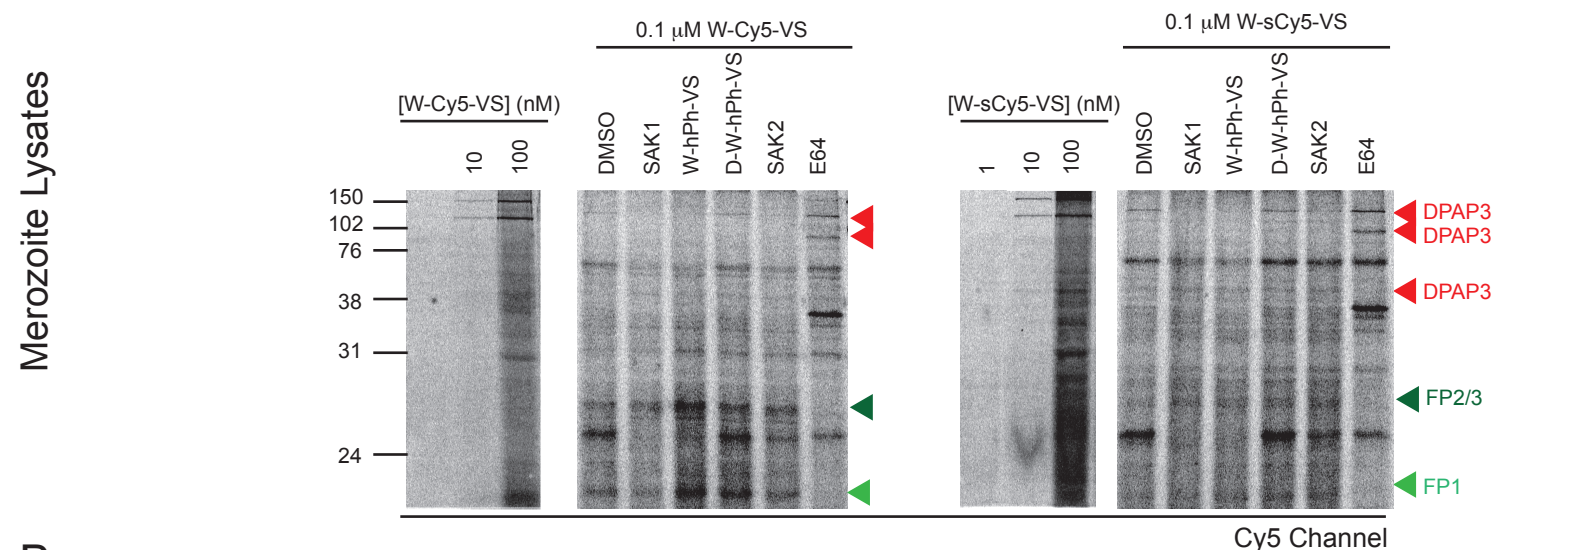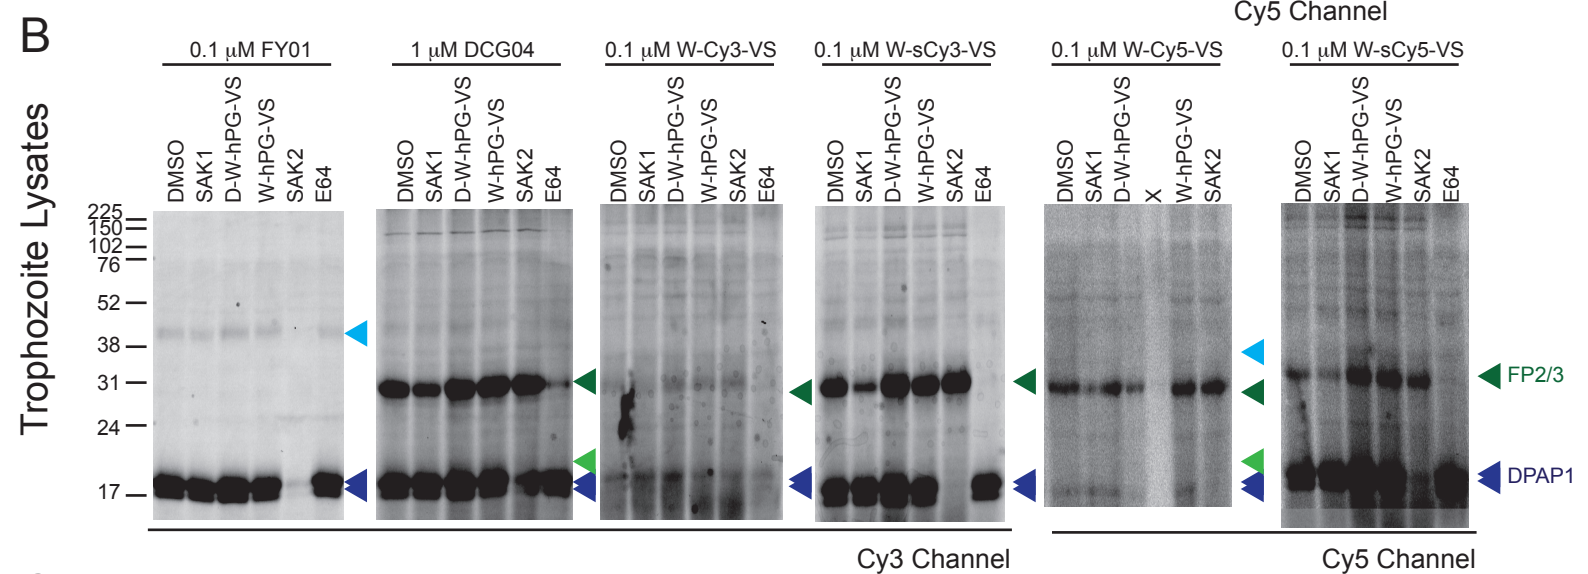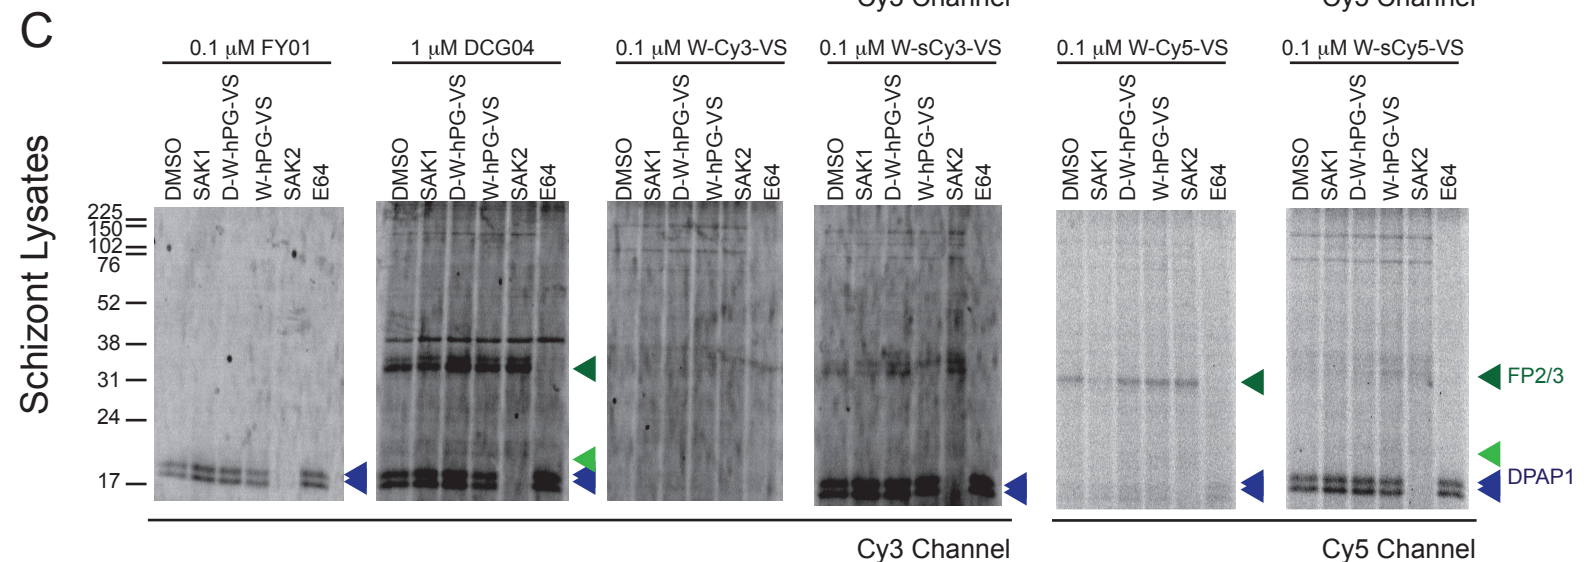

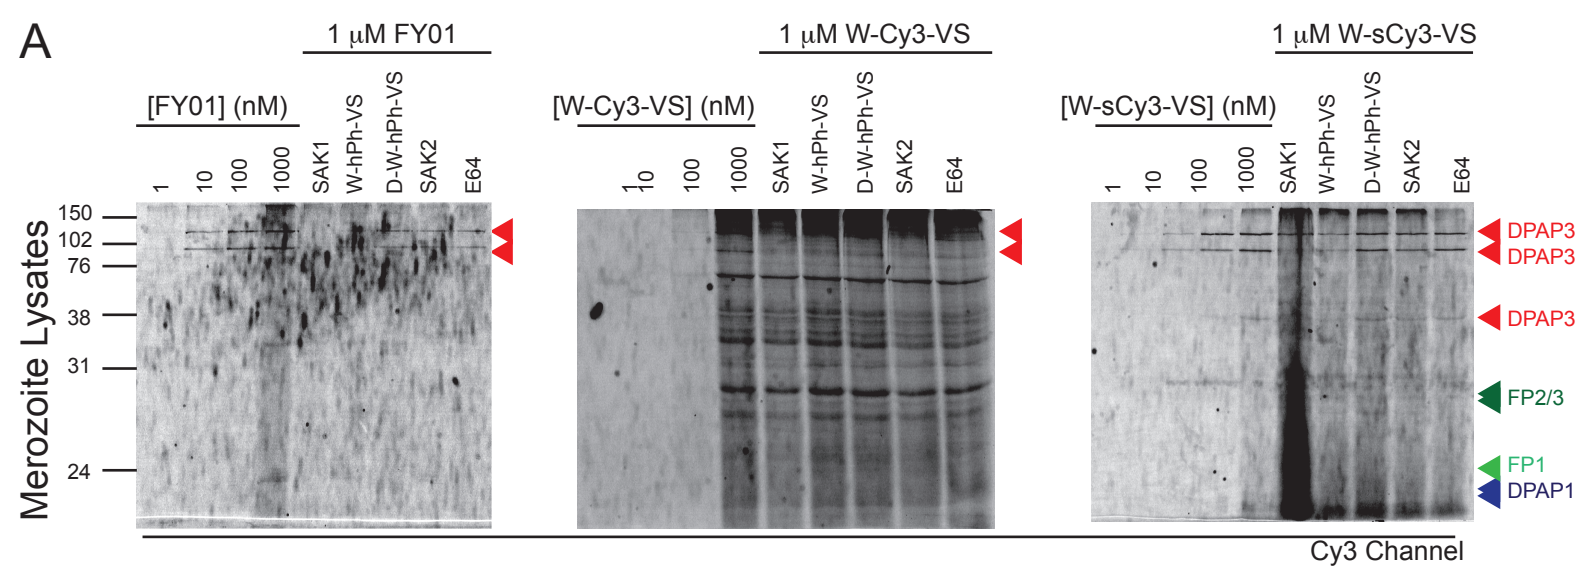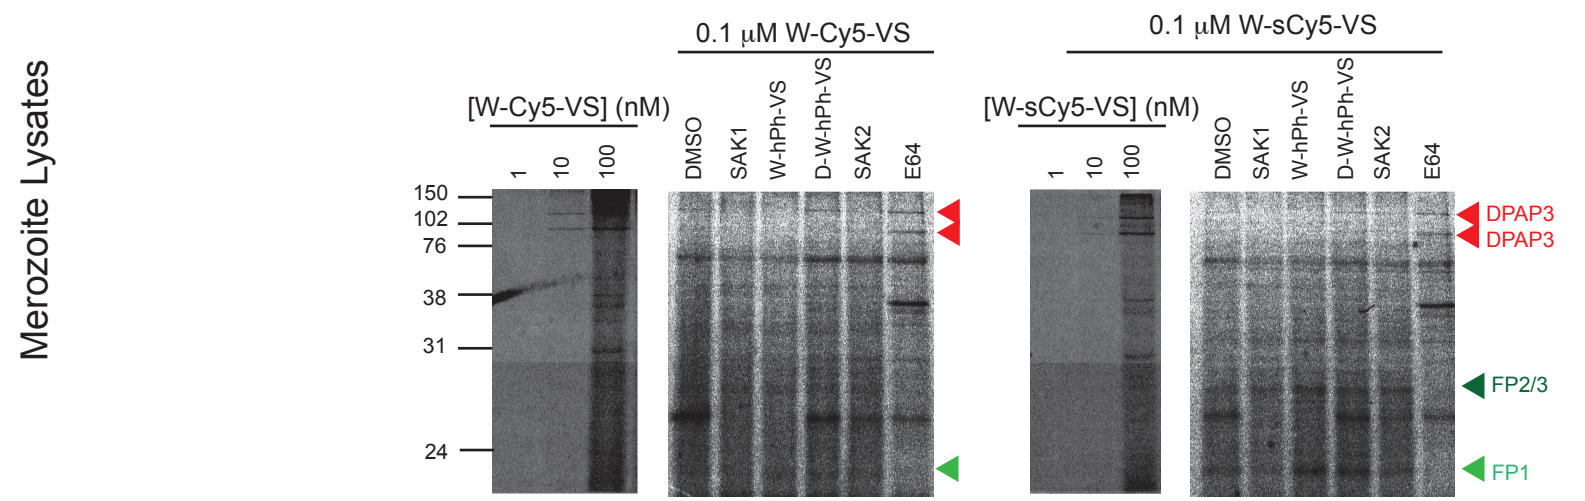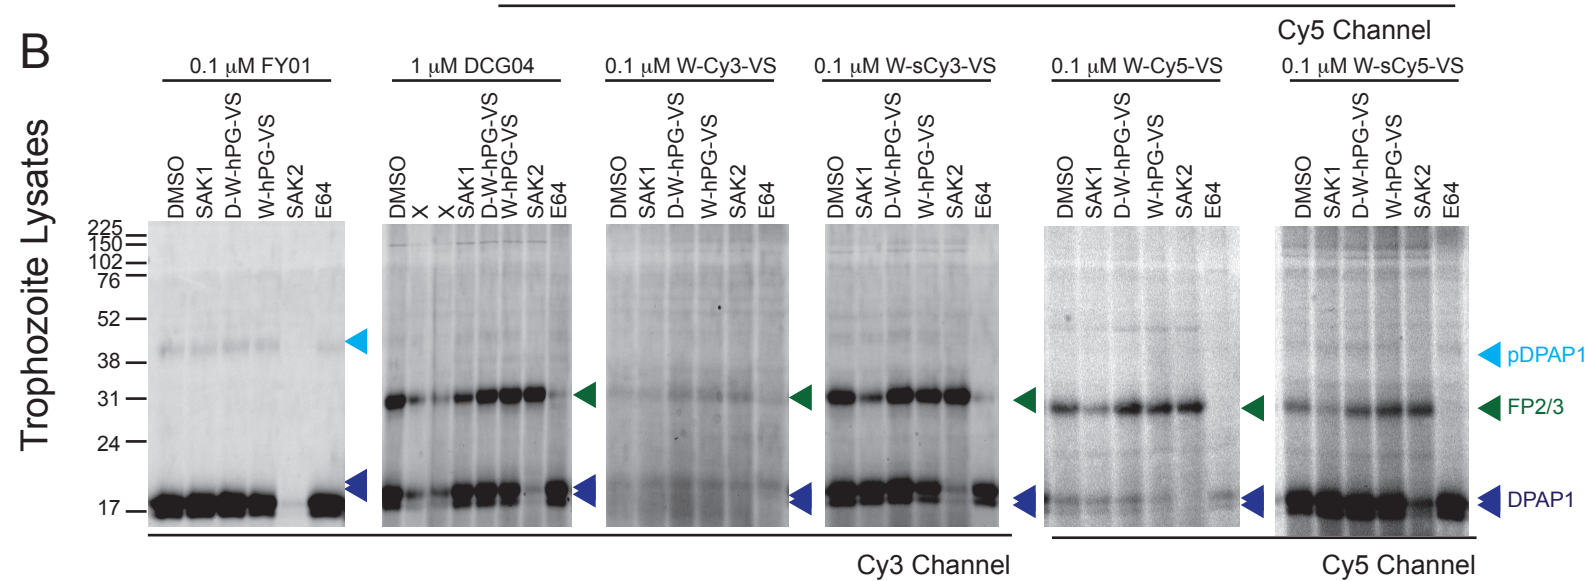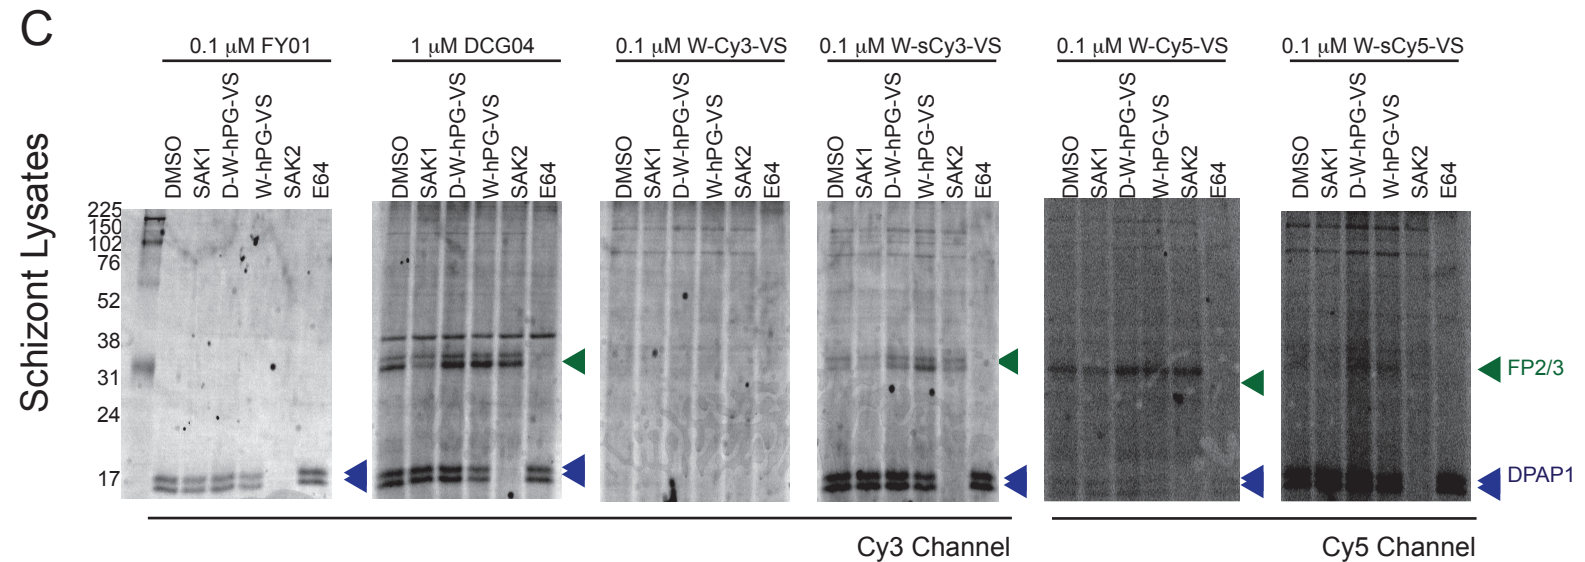

Supplement: pone.0227341.s003.pdf [file pone.0227341.s003.pdf]
